# Supplementary material for: Association between SNPs in Leptin Pathway Genes and Anthropometric, Biochemical, and Dietary Markers Related to Obesity
Source: MDPI journal article supplement (doi:10.3390/genes13060945), 2022-05-25
Supplement: s1 [file s1]

**Table S1.** Determination of the influence of SNPs on classic marker of obesity.

| SNP         | Obesity marker      | Model   | Mean  | S.D.  | p-Value |
|-------------|---------------------|---------|-------|-------|---------|
| LEP         |                     |         |       |       |         |
| rs10244329  | Body Fat (%)        | XX      | 24.39 | 10.51 | 0.045   |
|             |                     | Xx + xx | 26.73 | 9.07  |         |
|             | Waist circumference | XX      | 77.80 | 13.29 | 0.011   |
|             |                     | Xx + xx | 81.52 | 11.81 |         |
|             | BMI                 | XX      | 22.60 | 5.09  | 0.014   |
|             |                     | Xx + xx | 23.95 | 4.29  |         |
| rs11760956  | Body Fat (%)        | XX      | 25.05 | 9.52  | 0.011   |
|             |                     | Xx + xx | 27.15 | 9.11  |         |
|             | Waist circumference | XX      | 79.23 | 11.77 | 0.009   |
|             |                     | Xx + xx | 81.97 | 12.14 |         |
|             | BMI                 | XX      | 23.03 | 4.45  | 0.004   |
|             |                     | Xx + xx | 24.15 | 4.36  |         |
| rs4731426   | Body Fat (%)        | XX      | 25.93 | 8.82  | 0.465   |
|             |                     | Xx + xx | 26.59 | 9.46  |         |
|             | Waist circumference | XX      | 81.02 | 11.64 | 0.995   |
|             |                     | Xx + xx | 81.02 | 12.24 |         |
|             | BMI                 | XX      | 23.93 | 4.23  | 0.599   |
|             |                     | Xx + xx | 23.71 | 4.49  |         |
| LEPR        |                     |         |       |       |         |
| rs111573261 | Body Fat (%)        | XX      | 26.42 | 9.27  | 0.813   |
|             |                     | Xx + xx | 26.84 | 9.61  |         |
|             | Waist circumference | XX      | 80.93 | 11.76 | 0.631   |
|             |                     | Xx + xx | 81.98 | 12.38 |         |
|             | BMI                 | XX      | 23.76 | 4.35  | 0.913   |
|             |                     | Xx + xx | 23.67 | 4.17  |         |
| rs78862345  | Body Fat (%)        | XX      | 26.42 | 9.27  | 0.813   |
|             |                     | Xx + xx | 26.84 | 9.61  |         |
|             | Waist circumference | XX      | 80.93 | 11.76 | 0.631   |
|             |                     | Xx + xx | 81.98 | 12.38 |         |
|             | BMI                 | XX      | 23.76 | 4.35  | 0.913   |
|             |                     | Xx + xx | 23.67 | 4.17  |         |
| rs114280901 | Body Fat (%)        | XX      | 26.50 | 9.31  | 0.435   |
|             |                     | Xx + xx | 24.76 | 8.39  |         |
|             | Waist circumference | XX      | 81.06 | 11.80 | 0.415   |
|             |                     | Xx + xx | 78.85 | 11.35 |         |
|             | BMI                 | XX      | 23.80 | 4.34  | 0.174   |
|             |                     |         |       |       |         |

|            |                     |         |       |       |       |
|------------|---------------------|---------|-------|-------|-------|
|            |                     | Xx + xx | 22.42 | 4.17  |       |
| rs12035604 | Body Fat (%)        | XX      | 25.80 | 9.24  | 0.166 |
|            |                     | Xx + xx | 26.91 | 9.30  |       |
|            | Waist circumference | XX      | 80.62 | 11.30 | 0.529 |
|            |                     | Xx + xx | 81.25 | 12.13 |       |
|            | BMI                 | XX      | 23.44 | 4.01  | 0.148 |
|            |                     | Xx + xx | 23.97 | 4.55  |       |
| rs1137101  | Body Fat (%)        | XX      | 25.53 | 8.82  | 0.14  |
|            |                     | Xx + xx | 26.81 | 9.45  |       |
|            | Waist circumference | XX      | 81.05 | 11.11 | 0.93  |
|            |                     | Xx + xx | 80.96 | 12.06 |       |
|            | BMI                 | XX      | 23.51 | 3.87  | 0.374 |
|            |                     | Xx + xx | 23.85 | 4.51  |       |
| rs4655723  | Body Fat (%)        | XX      | 25.84 | 9.22  | 0.162 |
|            |                     | Xx + xx | 26.95 | 9.32  |       |
|            | Waist circumference | XX      | 80.69 | 11.19 | 0.584 |
|            |                     | Xx + xx | 81.23 | 12.27 |       |
|            | BMI                 | XX      | 23.50 | 4.04  | 0.186 |
|            |                     | Xx + xx | 23.97 | 4.57  |       |
| rs6700896  | Body Fat (%)        | XX      | 25.78 | 8.89  | 0.35  |
|            |                     | Xx + xx | 26.65 | 9.40  |       |
|            | Waist circumference | XX      | 81.21 | 11.40 | 0.798 |
|            |                     | Xx + xx | 80.92 | 11.91 |       |
|            | BMI                 | XX      | 23.65 | 4.25  | 0.743 |
|            |                     | Xx + xx | 23.78 | 4.37  |       |
| rs1805096  | Body Fat (%)        | XX      | 25.72 | 8.85  | 0.308 |
|            |                     | Xx + xx | 26.67 | 9.41  |       |
|            | Waist circumference | XX      | 80.98 | 11.53 | 0.999 |
|            |                     | Xx + xx | 80.99 | 11.87 |       |
|            | BMI                 | XX      | 23.62 | 4.26  | 0.695 |
|            |                     | Xx + xx | 23.79 | 4.36  |       |
| rs9436301  | Body Fat (%)        | XX      | 26.21 | 9.41  | 0.556 |
|            |                     | Xx + xx | 26.67 | 9.18  |       |
|            | Waist circumference | XX      | 81.18 | 11.88 | 0.705 |
|            |                     | Xx + xx | 80.80 | 11.70 |       |
|            | BMI                 | XX      | 23.76 | 4.24  | 0.945 |
|            |                     | Xx + xx | 23.74 | 4.43  |       |
| rs77451629 | Body Fat (%)        | XX      | 26.48 | 9.26  | 0.549 |
|            |                     | Xx + xx | 24.70 | 10.89 |       |

|            |                     |         |       |       |       |
|------------|---------------------|---------|-------|-------|-------|
|            | Waist circumference | XX      | 81.04 | 11.80 | 0.4   |
|            |                     | Xx + xx | 78.02 | 11.09 |       |
|            | BMI                 | XX      | 23.78 | 4.34  | 0.224 |
|            |                     | Xx + xx | 22.17 | 3.93  |       |
| rs1171278  | Body Fat (%)        | XX      | 26.31 | 9.28  | 0.722 |
|            |                     | Xx + xx | 26.59 | 9.30  |       |
|            | Waist circumference | XX      | 81.01 | 11.52 | 0.996 |
|            |                     | Xx + xx | 80.96 | 12.06 |       |
|            | BMI                 | XX      | 23.72 | 4.17  | 0.88  |
|            |                     | Xx + xx | 23.78 | 4.50  |       |
| rs12145690 | Body Fat (%)        | XX      | 27.24 | 9.24  | 0.259 |
|            |                     | Xx + xx | 26.20 | 9.29  |       |
|            | Waist circumference | XX      | 81.08 | 11.72 | 0.911 |
|            |                     | Xx + xx | 80.96 | 11.81 |       |
|            | BMI                 | XX      | 23.93 | 4.50  | 0.591 |
|            |                     | Xx + xx | 23.70 | 4.29  |       |
| rs9436301  | Body Fat (%)        | XX      | 26.21 | 9.41  | 0.556 |
|            |                     | Xx + xx | 26.67 | 9.18  |       |
|            | Waist circumference | XX      | 81.18 | 11.88 | 0.705 |
|            |                     | Xx + xx | 80.80 | 11.70 |       |
|            | BMI                 | XX      | 23.76 | 4.24  | 0.945 |
|            |                     | Xx + xx | 23.74 | 4.43  |       |
| rs11208648 | Body Fat (%)        | XX      | 26.42 | 9.26  | 0.783 |
|            |                     | Xx + xx | 26.95 | 10.00 |       |
|            | Waist circumference | XX      | 81.03 | 11.81 | 0.649 |
|            |                     | Xx + xx | 79.96 | 11.32 |       |
|            | BMI                 | XX      | 23.77 | 4.33  | 0.665 |
|            |                     | Xx + xx | 23.39 | 4.57  |       |
| rs970467   | Body Fat (%)        | XX      | 26.40 | 9.33  | 0.882 |
|            |                     | Xx + xx | 26.53 | 9.20  |       |
|            | Waist circumference | XX      | 80.98 | 11.79 | 0.982 |
|            |                     | Xx + xx | 81.00 | 11.81 |       |
|            | BMI                 | XX      | 23.69 | 4.19  | 0.601 |
|            |                     | Xx + xx | 23.89 | 4.63  |       |
| rs10128072 | Body Fat (%)        | XX      | 26.29 | 9.24  | 0.653 |
|            |                     | Xx + xx | 26.64 | 9.35  |       |
|            | Waist circumference | XX      | 81.11 | 11.99 | 0.78  |
|            |                     | Xx + xx | 80.83 | 11.54 |       |
|            | BMI                 | XX      | 23.70 | 4.19  | 0.75  |

|            |                     |         |       |       |       |
|------------|---------------------|---------|-------|-------|-------|
|            |                     | Xx + xx | 23.82 | 4.51  |       |
| rs1171278  | Body Fat (%)        | XX      | 26.31 | 9.28  | 0.722 |
|            |                     | Xx + xx | 26.59 | 9.30  |       |
|            | Waist circumference | XX      | 81.01 | 11.52 | 0.996 |
|            |                     | Xx + xx | 80.96 | 12.06 |       |
|            | BMI                 | XX      | 23.72 | 4.17  | 0.88  |
|            |                     | Xx + xx | 23.78 | 4.50  |       |
| rs77451629 | Body Fat (%)        | XX      | 26.48 | 9.26  | 0.549 |
|            |                     | Xx + xx | 24.70 | 10.89 |       |
|            | Waist circumference | XX      | 81.04 | 11.80 | 0.392 |
|            |                     | Xx + xx | 78.02 | 11.09 |       |
|            | BMI                 | XX      | 23.78 | 4.34  | 0.224 |
|            |                     | Xx + xx | 22.17 | 3.93  |       |
| rs2025804  | Body Fat (%)        | XX      | 26.45 | 8.58  | 0.996 |
|            |                     | Xx + xx | 26.44 | 9.41  |       |
|            | Waist circumference | XX      | 82.24 | 12.81 | 0.292 |
|            |                     | Xx + xx | 80.77 | 11.60 |       |
|            | BMI                 | XX      | 24.39 | 4.34  | 0.144 |
|            |                     | Xx + xx | 23.64 | 4.33  |       |
| rs2104564  | Body Fat (%)        | XX      | 27.10 | 8.62  | 0.513 |
|            |                     | Xx + xx | 26.34 | 9.38  |       |
|            | Waist circumference | XX      | 81.94 | 12.24 | 0.451 |
|            |                     | Xx + xx | 80.84 | 11.72 |       |
|            | BMI                 | XX      | 24.38 | 4.24  | 0.177 |
|            |                     | Xx + xx | 23.66 | 4.35  |       |
| rs1751492  | Body Fat (%)        | XX      | 26.39 | 8.20  | 0.956 |
|            |                     | Xx + xx | 26.45 | 9.42  |       |
|            | Waist circumference | XX      | 80.37 | 11.75 | 0.657 |
|            |                     | Xx + xx | 81.06 | 11.79 |       |
|            | BMI                 | XX      | 23.82 | 3.93  | 0.884 |
|            |                     | Xx + xx | 23.74 | 4.39  |       |
| rs11208659 | Body Fat (%)        | XX      | 26.46 | 9.22  | 0.903 |
|            |                     | Xx + xx | 26.32 | 9.74  |       |
|            | Waist circumference | XX      | 81.12 | 11.93 | 0.48  |
|            |                     | Xx + xx | 80.11 | 10.80 |       |
|            | BMI                 | XX      | 23.82 | 4.38  | 0.323 |
|            |                     | Xx + xx | 23.30 | 4.04  |       |
| rs1045895  | Body Fat (%)        | XX      | 27.08 | 8.98  | 0.11  |
|            |                     | Xx + xx | 25.82 | 9.54  |       |

|                     |                     |              |         |       |       |       |
|---------------------|---------------------|--------------|---------|-------|-------|-------|
|                     | Waist circumference | XX           | 81.50   | 11.97 | 0.301 |       |
|                     |                     | Xx + xx      | 80.48   | 11.60 |       |       |
|                     | BMI                 | XX           | 24.09   | 4.39  | 0.06  |       |
|                     |                     | Xx + xx      | 23.41   | 4.26  |       |       |
| rs9436748           | Body Fat (%)        | XX           | 26.92   | 9.03  | 0.253 |       |
|                     |                     | Xx + xx      | 26.02   | 9.50  |       |       |
|                     | Waist circumference | XX           | 81.40   | 12.01 | 0.428 |       |
|                     |                     | Xx + xx      | 80.61   | 11.58 |       |       |
|                     | BMI                 | XX           | 24.08   | 4.44  | 0.084 |       |
|                     |                     | Xx + xx      | 23.45   | 4.23  |       |       |
|                     | rs10749753          | Body Fat (%) | XX      | 26.73 | 9.03  | 0.403 |
|                     |                     |              | Xx + xx | 26.07 | 9.61  |       |
| Waist circumference |                     | XX           | 81.40   | 11.91 | 0.338 |       |
|                     |                     | Xx + xx      | 80.45   | 11.61 |       |       |
|                     | BMI                 | XX           | 23.99   | 4.33  | 0.134 |       |
|                     |                     | Xx + xx      | 23.44   | 4.33  |       |       |
|                     | rs72683113          | Body Fat (%) | XX      | 26.53 | 9.20  | 0.561 |
|                     |                     |              | Xx + xx | 25.80 | 9.98  |       |
| Waist circumference |                     | XX           | 81.07   | 11.73 | 0.651 |       |
|                     |                     | Xx + xx      | 80.33   | 12.26 |       |       |
|                     | BMI                 | XX           | 23.80   | 4.33  | 0.482 |       |
|                     |                     | Xx + xx      | 23.39   | 4.41  |       |       |
|                     | rs1137101           | Body Fat (%) | XX      | 25.53 | 8.82  | 0.14  |
|                     |                     |              | Xx + xx | 26.81 | 9.45  |       |
| Waist circumference |                     | XX           | 81.05   | 11.11 | 0.93  |       |
|                     |                     | Xx + xx      | 80.96   | 12.06 |       |       |
|                     | BMI                 | XX           | 23.51   | 3.87  | 0.374 |       |
|                     |                     | Xx + xx      | 23.85   | 4.51  |       |       |
|                     | PSKC1               |              |         |       |       |       |
|                     | rs17392686          | Body Fat (%) | XX      | 26.46 | 9.35  | 0.913 |
| Xx + xx             |                     |              | 26.92   | 8.10  |       |       |
| Waist circumference |                     | XX           | 81.04   | 12.09 | 0.898 |       |
|                     |                     | Xx + xx      | 81.73   | 11.73 |       |       |
|                     | BMI                 | XX           | 23.80   | 4.46  | 0.713 |       |
|                     |                     | Xx + xx      | 23.07   | 3.99  |       |       |
|                     | rs271923            | Body Fat (%) | XX      | 27.19 | 9.99  | 0.53  |
|                     |                     |              | Xx + xx | 26.38 | 9.26  |       |
| Waist circumference |                     | XX           | 82.37   | 13.71 | 0.363 |       |
|                     |                     | Xx + xx      | 80.89   | 11.88 |       |       |

|            |                     |         |       |       |       |
|------------|---------------------|---------|-------|-------|-------|
|            | BMI                 | XX      | 24.05 | 4.48  | 0.642 |
|            |                     | Xx + xx | 23.77 | 4.46  |       |
| MC4R       |                     |         |       |       |       |
| rs34114122 | Body Fat (%)        | XX      | 26.43 | 9.31  | 0.83  |
|            |                     | Xx + xx | 25.89 | 8.39  |       |
|            | Waist circumference | XX      | 81.04 | 11.91 | 0.237 |
|            |                     | Xx + xx | 77.48 | 10.34 |       |
|            | BMI                 | XX      | 23.77 | 4.34  | 0.514 |
|            |                     | Xx + xx | 23.03 | 4.40  |       |
| rs2229616  | Body Fat (%)        | XX      | 26.45 | 9.29  | 0.489 |
|            |                     | Xx + xx | 23.81 | 8.21  |       |
|            | Waist circumference | XX      | 81.03 | 11.90 | 0.127 |
|            |                     | Xx + xx | 74.13 | 7.32  |       |
|            | BMI                 | XX      | 23.77 | 4.35  | 0.347 |
|            |                     | Xx + xx | 22.10 | 2.53  |       |
| POMC       |                     |         |       |       |       |
| rs28932472 | Body Fat (%)        | XX      | 25.72 | 9.01  | 0.138 |
|            |                     | Xx + xx | 26.91 | 9.45  |       |
|            | Waist circumference | XX      | 80.78 | 10.96 | 0.742 |
|            |                     | Xx + xx | 81.10 | 12.51 |       |
|            | BMI                 | XX      | 23.48 | 3.93  | 0.216 |
|            |                     | Xx + xx | 23.94 | 4.60  |       |
